# Supplementary material for: Genome sequences of 24 Aspergillus niger sensu stricto strains to study strain diversity, heterokaryon compatibility, and sexual reproduction
Source: G3 (Bethesda). 2022 May 24;12(7):jkac124. doi: 10.1093/g3journal/jkac124 (PMC9258588; doi:10.1093/g3journal/jkac124)
Supplement: jkac124_Table_S1 [file jkac124_table_s1.xlsx]

## Sheet: Sheet1
Primer name	Bases	Description
pTE1_for	ccTTAATTAAactccgccgaacgtactg	Forward primer on promoter. Contains PacI site for ligation (upper case)
pTE1_rev	ccTTAATTAAaaaagcaaaaaaggaaggtacaaaaaagc	Reverse primer on terminator. Contains PacI site for ligation (upper case)
fwnA_1_fw	caagaattacaagccagtgagttttagagctagaaatagc	Crispr plasmid fwnA1
fwnA_1_rv	tcactggcttgtaattcttggacgagcttactcgtttcg	Crispr plasmid fwnA1
fwnA_2_fw	tttgttcacagtcctcaagagttttagagctagaaatagc	Crispr plasmid fwnA2
fwnA_2_rv	tcttgaggactgtgaacaaagacgagcttactcgtttcgt	Crispr plasmid fwnA2
pyrG_2_fw	gaggctgttcgagattgccggttttagagctagaaatagc	Crispr plasmid pyrG2
pyrG_2_rv	cggcaatctcgaacagcctcgacgagcttactcgtttcgt	Crispr plasmid pyrG2
f1_S_fwd	cccagcatagtcgtcgtaggag	Crispr check fwnA1 small deletions
f1_S_rev	cggttgtaattgcactgcgact	Crispr check fwnA1 small deletions
f1_L_fwd	ccagaagctctccgtaccatcc	Crispr check fwnA1 large deletions
f1_L_rev	tgcaattcgtcaagagatcgcg	Crispr check fwnA1 large deletions
f2_S_fwd	gttgatccagcaaccgtaagcc	Crispr check fwnA2 small deletions
f2_S_rev	ctctagaaggactgaccggctg	Crispr check fwnA2 small deletions
f2_L_fwd	aaatacccacacggtccctctg	Crispr check fwnA2 large deletions
p2_S_fwd	ggggctcgcgatgattttactg	Crispr check pyrG2 small deletions
p2_S_rev	ccgtgttgccgatgtcaatgaa	Crispr check pyrG2 small deletions
p2_L_fwd	gacgtcttttggagttgcgagg	Crispr check pyrG2 large deletions
p2_L_rev	gggcataatcgaccgaggaagt	Crispr check pyrG2 large deletions
MT1_fw	aggcccccgctcatagagttgg	Check for the presence of the MAT1-1-1 gene.
MT1_rv	aacggcggccactgaacagttt	Check for the presence of the MAT1-1-1 gene.
MT2_fw	tgcatttggcggacgaggaacc	Check for the presence of the MAT1-2-1 gene.
MT2_rv	ctcgcgaaccacagcagcaaga	Check for the presence of the MAT1-2-1 gene.
