# Supplementary material for: Genome sequences of 24 Aspergillus niger sensu stricto strains to study strain diversity, heterokaryon compatibility, and sexual reproduction
Source: G3 (Bethesda). 2022 May 24;12(7):jkac124. doi: 10.1093/g3journal/jkac124 (PMC9258588; doi:10.1093/g3journal/jkac124)
Supplement: jkac124_Table_S2 [file jkac124_table_s2.xlsx]

## Sheet: Sequencing data
Strain	NRRL3	CBS 147353	CBS 147343	CBS 118.52	CBS 15988	CBS 630.78	CBS 147371	CBS 147320	CBS 147321	CBS 147322	CBS 147323	CBS 147324	CBS 113.50	CBS 147482	CBS 112.32	CBS 147344	CBS 133816	CBS 147345	CBS 147346	CBS 147347	CBS 124.48	CBS 769.97	CBS 115989	CBS 131.52	CBS 147352
Number of scaffolds	15	940	159	377	282	472	221	335	268	205	263	221	169	366	280	228	371	363	203	387	425	297	269	327	367
Total assembly length (Mbp)	35.25	38.91	35.38	37.46	35.81	36.32	35.47	34.77	36.47	35.76	36.48	35.71	35.65	34.99	35.81	35.44	34.97	35.06	35.66	37.63	35.52	37.11	35.82	37.12	35.41
Assembly GC content (%)	49.92	50.03	49.48	49.48	49.46	50.01	49.5	50.05	49.51	49.49	49.46	49.47	49.44	50.07	49.46	49.5	49.97	50.07	49.31	49.49	49.7	49.52	49.46	49.52	49.9
Assembly gaps (%)	0	0.01	0.01	0	0.01	0.01	0	0.01	0.01	0.01	0.01	0.01	0.01	0.01	0	0	0.01	0.01	0.01	0.01	0.01	0.01	0.01	0.01	0.01
L50 number (#)	5	38	33	38	41	40	35	32	40	35	36	40	30	39	42	45	38	40	39	41	45	23	45	29	35
N50 length (bp)	2807075	293433	362096	295553	275995	310247	322101	326362	286370	334720	322506	269898	403187	263286	249900	278867	270035	291991	296363	277855	242944	455986	276198	378684	332623
Total repeats (#)	n.a.	13548	11849	12821	12338	11963	11935	11744	12692	11995	12331	12098	12034	11813	12162	11940	11983	11791	12051	12697	12365	12944	12183	12850	12059
Repetitive content (bp, %)	n.a.	1742552 (4.48%)	643337 (1.82%)	1117673 (2.98%)	701924 (1.96%)	761181 (2.1%)	609094 (1.72%)	681441 (1.96%)	1030182 (2.83%)	600724 (1.68%)	834022 (2.29%)	677351 (1.9%)	665579 (1.87%)	654726 (1.87%)	745512 (2.08%)	601493 (1.7%)	640811 (1.83%)	664346 (1.89%)	575506 (1.61%)	1125368 (2.99%)	659588 (1.86%)	1332288 (3.59%)	594841 (1.66%)	1330991 (3.59%)	690964 (1.95%)
Genes	11846	11934	11046	11540	11102	11360	11103	11072	11297	11166	11294	11114	11106	11129	11098	11085	11100	11173	11053	11563	11159	11481	11094	11468	11170
Gene length (median)	1417	1416	1440	1426	1437	1431	1438	1439	1434	1437	1433	1440	1440	1438	1441	1438	1438	1437	1446	1429	1437	1426	1441	1428	1437
Transcript length (median)	1266	1236	1263	1252	1263	1257	1263	1263	1257	1263	1257	1263	1266	1263	1263	1263	1263	1263	1266	1251	1260	1254	1263	1254	1263
Exon length (median)	244	228	226	228	227	228	226	228	227	227	227	228	227	227	227	227	227	225	229	228	227	228	227	227	228
CDS length (median)	1266	1236	1263	1252	1263	1257	1263	1263	1257	1263	1257	1263	1266	1263	1263	1263	1263	1263	1266	1251	1260	1254	1263	1254	1263
Protein length (median)	422	412	421	417	421	419	421	421	419	421	419	421	422	421	421	421	421	421	422	417	420	418	421	418	421
Spliced genes (total, %)	9515 (80.32%)	9591 (80.37%)	8985 (81.34%)	9282 (80.43%)	9025 (81.29%)	9197 (80.96%)	9032 (81.35%)	8999 (81.28%)	9164 (81.12%)	9077 (81.29%)	9130 (80.84%)	9041 (81.35%)	9029 (81.3%)	9053 (81.35%)	9020 (81.28%)	9015 (81.33%)	9033 (81.38%)	9092 (81.37%)	8984 (81.28%)	9346 (80.83%)	9065 (81.23%)	9269 (80.73%)	9017 (81.28%)	9263 (80.77%)	9059 (81.1%)
Exons per gene (median)	3	3	3	3	3	3	3	3	3	3	3	3	3	3	3	3	3	3	3	3	3	3	3	3	3
Intron length (median)	60	61	61	61	61	61	61	61	61	61	61	61	61	61	61	61	61	61	61	61	61	61	61	61	61
Introns per spliced gene (median)	2	2	2	2	2	2	2	2	2	2	2	2	2	2	2	2	2	2	2	2	2	2	2	2	2
Gene density (genes / Mbp)	336.1	306.74	312.19	308.08	310.05	312.81	312.99	318.41	309.8	312.21	309.55	311.26	311.49	318.09	309.92	312.79	317.45	318.64	310	307.29	314.17	309.38	309.7	308.98	315.47
Coding content of assembly (bp, %)	17767909 (50.41%)	17674650 (45.43%)	16692102 (47.18%)	17247060 (46.04%)	16789752 (46.89%)	17088381 (47.05%)	16738833 (47.19%)	16739142 (48.14%)	16957584 (46.5%)	16835061 (47.07%)	16940835 (46.43%)	16790445 (47.02%)	16784298 (47.07%)	16796343 (48.01%)	16789167 (46.88%)	16735536 (47.22%)	16768269 (47.96%)	16858182 (48.08%)	16769781 (47.03%)	17285067 (45.94%)	16817310 (47.35%)	17165655 (46.26%)	16796784 (46.89%)	17158341 (46.23%)	16862127 (47.62%)
Unique PFAM domains	4086	4054	4039	4049	4037	4039	4042	4041	4048	4035	4045	4045	4041	4040	4036	4042	4040	4038	4034	4048	4042	4044	4038	4044	4045
Genes with PFAM (total, %)	9131 (77.08%)	8951 (75.0%)	8567 (77.56%)	8789 (76.16%)	8576 (77.25%)	8687 (76.47%)	8594 (77.4%)	8582 (77.51%)	8637 (76.45%)	8621 (77.21%)	8650 (76.59%)	8605 (77.42%)	8592 (77.36%)	8613 (77.39%)	8582 (77.33%)	8592 (77.51%)	8598 (77.46%)	8637 (77.3%)	8600 (77.81%)	8792 (76.04%)	8620 (77.25%)	8727 (76.01%)	8580 (77.34%)	8721 (76.05%)	8640 (77.35%)
Genes with GO (total, %)	6133 (51.77%)	5988 (50.18%)	5760 (52.15%)	5894 (51.07%)	5748 (51.77%)	5834 (51.36%)	5780 (52.06%)	5780 (52.2%)	5800 (51.34%)	5798 (51.93%)	5813 (51.47%)	5789 (52.09%)	5771 (51.96%)	5795 (52.07%)	5754 (51.85%)	5784 (52.18%)	5779 (52.06%)	5810 (52.0%)	5790 (52.38%)	5904 (51.06%)	5796 (51.94%)	5862 (51.06%)	5753 (51.86%)	5862 (51.12%)	5807 (51.99%)
Genes with signalP (total, %)	1072 (9.05%)	1032 (8.65%)	984 (8.91%)	998 (8.65%)	985 (8.87%)	996 (8.77%)	982 (8.84%)	992 (8.96%)	1006 (8.91%)	998 (8.94%)	1000 (8.85%)	1000 (9.0%)	981 (8.83%)	1006 (9.04%)	985 (8.88%)	987 (8.9%)	991 (8.93%)	1001 (8.96%)	991 (8.97%)	1012 (8.75%)	1003 (8.99%)	999 (8.7%)	982 (8.85%)	1000 (8.72%)	997 (8.93%)
Genes with TMHMM (total, %)	2535 (21.4%)	2490 (20.86%)	2346 (21.24%)	2421 (20.98%)	2344 (21.11%)	2403 (21.15%)	2353 (21.19%)	2353 (21.25%)	2372 (21.0%)	2360 (21.14%)	2388 (21.14%)	2358 (21.22%)	2354 (21.2%)	2366 (21.26%)	2339 (21.08%)	2349 (21.19%)	2359 (21.25%)	2369 (21.2%)	2328 (21.06%)	2431 (21.02%)	2361 (21.16%)	2421 (21.09%)	2340 (21.09%)	2416 (21.07%)	2367 (21.19%)
Genes annotated as TF (total, %)	640 (5.4%)	594 (4.98%)	552 (5.0%)	569 (4.93%)	548 (4.94%)	563 (4.96%)	549 (4.94%)	549 (4.96%)	560 (4.96%)	555 (4.97%)	564 (4.99%)	553 (4.98%)	552 (4.97%)	553 (4.97%)	550 (4.96%)	553 (4.99%)	548 (4.94%)	561 (5.02%)	552 (4.99%)	577 (4.99%)	561 (5.03%)	564 (4.91%)	546 (4.92%)	562 (4.9%)	555 (4.97%)
Genes annotated as MEROPS protease (total, %)	379 (3.2%)	389 (3.26%)	367 (3.32%)	382 (3.31%)	363 (3.27%)	372 (3.27%)	368 (3.31%)	363 (3.28%)	363 (3.21%)	369 (3.3%)	373 (3.3%)	365 (3.28%)	365 (3.29%)	369 (3.32%)	363 (3.27%)	367 (3.31%)	367 (3.31%)	364 (3.26%)	374 (3.38%)	375 (3.24%)	369 (3.31%)	379 (3.3%)	363 (3.27%)	377 (3.29%)	374 (3.35%)
Genes annotated as CAZyme (total, %)	504 (4.25%)	507 (4.25%)	492 (4.45%)	503 (4.36%)	493 (4.44%)	500 (4.4%)	490 (4.41%)	495 (4.47%)	495 (4.38%)	495 (4.43%)	498 (4.41%)	497 (4.47%)	495 (4.46%)	498 (4.47%)	492 (4.43%)	497 (4.48%)	495 (4.46%)	498 (4.46%)	489 (4.42%)	502 (4.34%)	495 (4.44%)	499 (4.35%)	492 (4.43%)	499 (4.35%)	491 (4.4%)
Secondary metabolism gene cluster	76	74	73	73	73	74	74	76	75	77	71	74	72	75	73	75	73	75	79	71	77	76	74	76	77
CEGMA completeness (%)	99.78	99.13	99.34	99.13	99.34	99.34	99.13	99.13	99.13	99.13	99.34	99.13	99.13	99.34	99.34	99.13	99.13	99.34	99.13	99.34	99.13	99.34	99.34	99.34	99.34
BUSCO2 completeness (fungi_odb9)	Complete: 99.66% (Single-copy: 98.97%, Duplicated: 0.69%), Fragmented: 0.34%, Missing: 0.0%	Complete: 98.97% (Single-copy: 97.93%, Duplicated: 1.03%), Fragmented: 1.03%, Missing: 0.0%	Complete: 99.31% (Single-copy: 98.97%, Duplicated: 0.34%), Fragmented: 0.69%, Missing: 0.0%	Complete: 98.97% (Single-copy: 98.28%, Duplicated: 0.69%), Fragmented: 1.03%, Missing: 0.0%	Complete: 98.97% (Single-copy: 98.28%, Duplicated: 0.69%), Fragmented: 1.03%, Missing: 0.0%	Complete: 99.31% (Single-copy: 98.62%, Duplicated: 0.69%), Fragmented: 0.69%, Missing: 0.0%	Complete: 99.31% (Single-copy: 98.62%, Duplicated: 0.69%), Fragmented: 0.69%, Missing: 0.0%	Complete: 99.31% (Single-copy: 98.62%, Duplicated: 0.69%), Fragmented: 0.69%, Missing: 0.0%	Complete: 99.31% (Single-copy: 98.62%, Duplicated: 0.69%), Fragmented: 0.69%, Missing: 0.0%	Complete: 98.97% (Single-copy: 98.28%, Duplicated: 0.69%), Fragmented: 0.69%, Missing: 0.34%	Complete: 98.62% (Single-copy: 97.93%, Duplicated: 0.69%), Fragmented: 1.38%, Missing: 0.0%	Complete: 99.31% (Single-copy: 98.62%, Duplicated: 0.69%), Fragmented: 0.69%, Missing: 0.0%	Complete: 98.97% (Single-copy: 98.28%, Duplicated: 0.69%), Fragmented: 1.03%, Missing: 0.0%	Complete: 99.31% (Single-copy: 98.62%, Duplicated: 0.69%), Fragmented: 0.69%, Missing: 0.0%	Complete: 98.62% (Single-copy: 97.93%, Duplicated: 0.69%), Fragmented: 1.38%, Missing: 0.0%	Complete: 99.31% (Single-copy: 98.62%, Duplicated: 0.69%), Fragmented: 0.69%, Missing: 0.0%	Complete: 98.97% (Single-copy: 98.28%, Duplicated: 0.69%), Fragmented: 1.03%, Missing: 0.0%	Complete: 98.97% (Single-copy: 98.28%, Duplicated: 0.69%), Fragmented: 1.03%, Missing: 0.0%	Complete: 98.28% (Single-copy: 97.59%, Duplicated: 0.69%), Fragmented: 1.38%, Missing: 0.34%	Complete: 98.97% (Single-copy: 98.28%, Duplicated: 0.69%), Fragmented: 1.03%, Missing: 0.0%	Complete: 99.31% (Single-copy: 98.62%, Duplicated: 0.69%), Fragmented: 0.69%, Missing: 0.0%	Complete: 98.97% (Single-copy: 97.93%, Duplicated: 1.03%), Fragmented: 1.03%, Missing: 0.0%	Complete: 98.97% (Single-copy: 98.28%, Duplicated: 0.69%), Fragmented: 1.03%, Missing: 0.0%	Complete: 98.97% (Single-copy: 97.93%, Duplicated: 1.03%), Fragmented: 1.03%, Missing: 0.0%	Complete: 99.31% (Single-copy: 98.62%, Duplicated: 0.69%), Fragmented: 0.69%, Missing: 0.0%
Reference	Aguilar-Pontes et al. 2018	this study	this study	this study	this study	this study	this study	this study	this study	this study	this study	this study	this study	this study	this study	this study	this study	this study	this study	this study	this study	this study	this study	this study	this study
