# Supplementary material for: Genome sequences of 24 Aspergillus niger sensu stricto strains to study strain diversity, heterokaryon compatibility, and sexual reproduction
Source: G3 (Bethesda). 2022 May 24;12(7):jkac124. doi: 10.1093/g3journal/jkac124 (PMC9258588; doi:10.1093/g3journal/jkac124)
Supplement: jkac124_Table_S3 [file jkac124_table_s3.xlsx]

## Sheet: Sheet1
Parent A (brnA-, nicB-)	Parent B (fwnA-, pyrG-)	Parasexual cross	Self-cross	Diploid strain
CBS 112.32	CBS 118.52	unsuccesful	no
CBS 112.32	CBS 112.32	succesful	yes	yes
CBS 147323	CBS 147347	succesful	no	SJS151
CBS 147323	CBS 112.32	unsuccesful	no
CBS 147323	CBS 118.52	unsuccesful	no
CBS 147323	CBS 147352	unsuccesful	no
CBS 147323	CBS 147353	unsuccesful	no
CBS 147323	CBS 147323	succesful	yes	(not tested)
CBS 147343	CBS 147352	unsuccesful	no
CBS 147343	CBS 147323	unsuccesful	no
CBS 147343	CBS 147347	unsuccesful	no
CBS 147343	CBS 1133816	unsuccesful	no
CBS 147343	CBS 1447324	unsuccesful	no
CBS 147347	CBS 147323	succesful	no	SJS150
CBS 147347	CBS 147353	unsuccesful	no
CBS 147347	CBS 112.32	unsuccesful	no
CBS 147347	CBS 118.52	unsuccesful	no
CBS 147347	CBS 147352	unsuccesful	no
CBS 147347	CBS 147353	unsuccesful	no
CBS 147347	CBS 147347	succesful	yes	(not tested)
CBS 147371	CBS 147324	unsuccesful	no
CBS 147482	CBS 1133816	unsuccesful	no
CBS 147482	CBS 1447324	unsuccesful	no
CBS 147482	CBS 147352	unsuccesful	no
CBS 147482	CBS 147353	unsuccesful	no
CBS 147482	CBS 147323	unsuccesful	no
CBS 147482	CBS 147347	unsuccesful	no
